# Supplementary material for: Non-linear elasticity, earthquake triggering and seasonal hydrological forcing along the Irpinia fault, Southern Italy
Source: PubMed Central journal article supplement — Nat Commun. 2024 Nov 13;15:9821. doi: 10.1038/s41467-024-54094-4 (PMC11561308; doi:10.1038/s41467-024-54094-4), 2024-11-13
Supplement: 41467_2024_54094_MOESM1_ESM.pdf [file 41467_2024_54094_MOESM1_ESM.pdf]

## Supplementary Material

# Non-linear elasticity, earthquake triggering and seasonal hydrological forcing along the Irpinia fault, Southern Italy

Stefania Tarantino<sup>1</sup>, Piero Poli<sup>2</sup>, Nicola D'Agostino<sup>3</sup>, Maurizio Vassallo<sup>1</sup>, Gaetano Festa<sup>4</sup>, Gerardo Ventafri<sup>5</sup>, Aldo Zollo<sup>4</sup>

<sup>1</sup>Istituto Nazionale di Geofisica e Vulcanologia, L'Aquila, Italy

<sup>2</sup>Department of Geoscience, University of Padova, Padova, Italy

<sup>3</sup>Istituto Nazionale Geofisica e Vulcanologia, Rome, Italy

<sup>4</sup>Department of Physics, University of Napoli, Napoli, Italy

<sup>5</sup>Approvvigionamento Idrico (DIRAP), Acquedotto Pugliese S.p.A., Bari, Italy

### Movie S1

**Text S1 – Complete derivation of poroelastic equation**

**Figure S1 – Velocity model, seismicity & depth sensitivity kernel**

**Figure S2 – Seismicity rate for varying space-temporal windows from Gardner & Knopoff**

## Complete derivation of poroelastic equation

Here we present the complete derivation of equation [3] in the main text.

We consider the following Cartesian system:  $x = ENE$ ;  $y = WSW$ ;  $z = up$ . Extensional stresses are considered positive. We write the poroelastic relations in a mixed-stiffness formulation <sup>1</sup>:

$$\begin{bmatrix} \sigma_{xx} + \alpha P \\ \sigma_{yy} + \alpha P \\ \sigma_{zz} + \alpha P \end{bmatrix} = \frac{E}{(1 + \nu)(1 - 2\nu)} \begin{bmatrix} 1 - \nu & \nu & \nu \\ \nu & 1 - \nu & \nu \\ \nu & \nu & 1 - \nu \end{bmatrix} \begin{bmatrix} \varepsilon_{xx} \\ \varepsilon_{yy} \\ \varepsilon_{zz} \end{bmatrix}$$

where  $\nu$  is the Poisson's ratio,  $E$  is the Young's modulus,  $\alpha$  is the Biot-Willis coefficient and  $P$  is the pore pressure variation. Setting  $\varepsilon_{yy} = \varepsilon_{zz} = 0$ :

$$\sigma_{xx} + \alpha P = E \frac{(1 - \nu)}{(1 + \nu)(1 - 2\nu)} \varepsilon_{xx}$$

$$\sigma_{yy} + \alpha P = E \frac{\nu}{(1 + \nu)(1 - 2\nu)} \varepsilon_{xx}$$

$$\sigma_{zz} + \alpha P = E \frac{\nu}{(1 + \nu)(1 - 2\nu)} \varepsilon_{xx}$$

and

$$\varepsilon_{xx} = \frac{\sigma_{zz} + \alpha P}{\frac{E\nu}{(1 + \nu)(1 - 2\nu)}}$$

Assuming that  $\sigma_{zz}$  (overburden stress) does not change with time and that  $P$  corresponds to a  $\Delta h$  change in elevation of the unconfined karst aquifer's water table and a hydraulic head change of  $\rho_w g \Delta h$ :

$$\Delta \varepsilon_{xx} = \frac{\alpha \rho_w g \Delta h}{\frac{E\nu}{(1 + \nu)(1 - 2\nu)}}$$

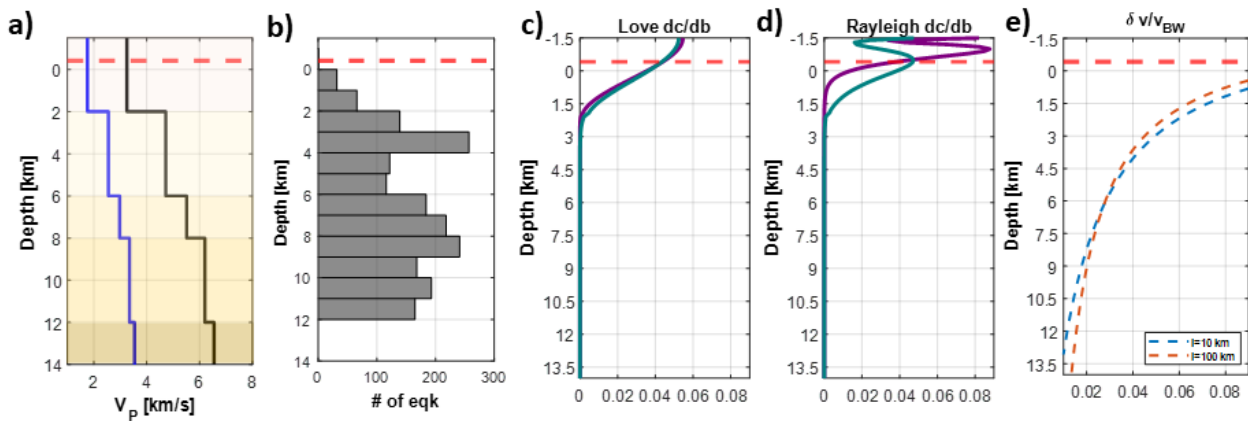

**Figure S1. Velocity model, seismicity & depth sensitivity kernel:** Surface waves sensitivity kernel, dashed line represent the level of Caposele Spring (417 m a.s.l) : a) P-wave (black line) and S-wave (blue line) velocity model <sup>2</sup> ; b) histogram of depth of earthquakes; c-d) Surface waves sensitivity kernel <sup>3</sup> at 0.5 Hz (green line) and at 1.0 Hz (purple line); e) Scattered body waves sensitivity kernel for coda wave time lapse 30 s for two different free paths : 10 km (blue dashed line) and 100 km (red dashed line).

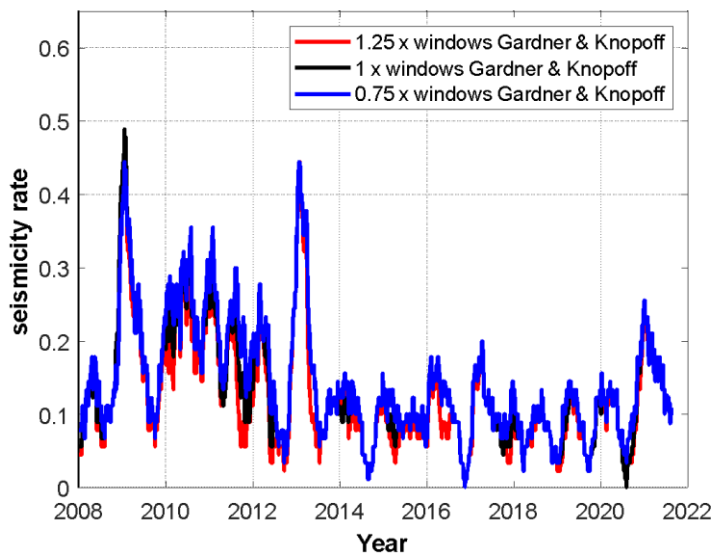

**Figure S2. Seismicity rate for varying space-temporal windows from Gardner & Knopoff <sup>4</sup>.**

## References

1. Wang, H. F. *Theory of Linear Poroelasticity—with Applications to Geomechanics and Hydrogeology* . (Princeton University Press, 2000).
2. Matrullo, E., De Matteis, R., Satriano, C., Amoroso, O. & Zollo, A. An improved 1-D seismic velocity model for seismological studies in the Campania–Lucania region (Southern Italy). *Geophys J Int* **195**, 460–473 (2013).
3. Herrmann, R. B. Computer Programs in Seismology: An Evolving Tool for Instruction and Research. *Seismological Research Letters* **84**, 1081–1088 (2013).
4. Gardner, J. K. & Knopoff, L. Is the sequence of earthquakes in Southern California, with aftershocks removed, Poissonian? *Bulletin of the Seismological Society of America* **64**, 1363–1367 (1974).
