# Supplementary material for: Non-linear elasticity, earthquake triggering and seasonal hydrological forcing along the Irpinia fault, Southern Italy
Source: PubMed Central journal article supplement — Nat Commun. 2024 Nov 13;15:9821. doi: 10.1038/s41467-024-54094-4 (PMC11561308; doi:10.1038/s41467-024-54094-4), 2024-11-13
Supplement: 41467_2024_54094_MOESM2_ESM.pdf [file 41467_2024_54094_MOESM2_ESM.pdf]

## Description of Additional Supplementary Files

**Supplementary Movie 1:** The complete, continuous strain evolution represented on the map. The time-dependent horizontal strain rate tensor at the surface is calculated by modeling the observed displacement with elementary cuboid sources

Left-hand panel of the movie was generated with Generic Mapping Tools.

From: Wessel, P. *et al.* The Generic Mapping Tools Version 6. *Geochemistry, Geophysics, Geosystems* **20**, 5556–5564 (2019).
